# Supplementary material for: Screening for Metallo-Beta-Lactamases Using Non-Carbapenem Agents: Effective Detection of MBL-Producing Enterobacterales and Differentiation of Carbapenem-Resistant Enterobacterales
Source: MDPI journal article supplement (doi:10.3390/antibiotics12071146), 2023-07-03
Supplement: s1 [file s1]

**Supplementary Table S2.** Classification of CRE strains based on drug susceptibility to ceftazidime and cefoperazone/sulbactam.

|                                      | Metallo beta lactamase |                 |
|--------------------------------------|------------------------|-----------------|
|                                      | Positive(n=14)         | Negative(n=146) |
| Resistant to both CAZ and CFP/SBT    | 14                     | 18              |
| Susceptible to either CAZ or CFP/SBT | 0                      | 128             |

Abbreviations: CAZ, ceftazidime; CFP/SBT, cefoperazone and sulbactam

There were 160 strains of CRE, which were classified into a four-tiered distribution based on drug susceptibility to ceftazidime and cefoperazone/sulbactam. All MBL-producing CRE strains showed resistance to ceftazidime and cefoperazone/sulbactam. For detailed information on MBL-producing CRE, please refer to Table 2. There were 18 non-MBL-producing CRE strains were resistant to both ceftazidime and cefoperazon/sulbactam and 128 non-MBL-producing CRE strains susceptible to either ceftazidime or cefoperazone/sulbactam. We classified the CRE isolates based on MBL-positive or -negative status and their resistance/susceptibility to two drugs in the four-cell table. Sensitivity and specificity were analysed based on this table. The isolates susceptible to both drugs did not include any MBL, and the statistical specificity and sensitivity were 87.7% and 100% respectively with statistical significance using Fisher's exact test ( $P < 0.01$ ).
