# Supplementary material for: Screening for Metallo-Beta-Lactamases Using Non-Carbapenem Agents: Effective Detection of MBL-Producing Enterobacterales and Differentiation of Carbapenem-Resistant Enterobacterales
Source: MDPI journal article supplement (doi:10.3390/antibiotics12071146), 2023-07-03
Supplement: s1 [file s1]

**Supplementary Table S1.** non-duplicate sequential 3776 isolates

| Bacterial isolates                | n=3776 |
|-----------------------------------|--------|
| <i>Escherichia coli</i>           | 1263   |
| <i>Klebsiella pneumoniae</i>      | 653    |
| <i>Enterobacter cloacae</i>       | 435    |
| <i>Klebsiella oxytoca</i>         | 229    |
| <i>Serratia marcescens</i>        | 221    |
| <i>Enterobacter aerogenes</i>     | 217    |
| <i>Proteus mirabilis</i>          | 130    |
| <i>Morganella morganii</i>        | 114    |
| <i>Citrobacter freundii</i>       | 101    |
| <i>Klebsiella ornithinolytica</i> | 96     |
| <i>Citrobacter koseri</i>         | 69     |
| <i>Proteus vulgaris</i>           | 59     |
| <i>Citrobacter braakii</i>        | 45     |
| <i>Citrobacter werkmanii</i>      | 14     |
| <i>Serratia liquefaciens</i>      | 14     |
| <i>Klebsiella sp.</i>             | 13     |
| <i>Providencia rettgeri</i>       | 11     |
| <i>Edwardsiella tarda</i>         | 9      |
| <i>Citrobacter sp.</i>            | 8      |
| <i>Pantoea sp.</i>                | 8      |
| <i>Proteus penneri</i>            | 8      |
| <i>Citrobacter youngae</i>        | 7      |
| <i>Klebsiella planticola</i>      | 6      |
| <i>Citrobacter amalonaticus</i>   | 5      |
| <i>Enterobacter sp.</i>           | 5      |
| <i>Enterobacter gergoviae</i>     | 4      |
| <i>Pantoea agglomerans</i>        | 4      |
| <i>Leclercia adecarboxylata</i>   | 3      |
| <i>Pasteurella canis</i>          | 3      |
| <i>Providencia stuartii</i>       | 3      |
| <i>Enterobacter sakazakii</i>     | 2      |
| <i>Kluyvera cryocrescens</i>      | 2      |
| <i>Proteus sp.</i>                | 2      |
| <i>Yersinia enterocolitica</i>    | 2      |

|                                 |      |
|---------------------------------|------|
| <i>Capnocytophaga ochracea</i>  | 1    |
| <i>Enterobacter amnigenus</i>   | 1    |
| <i>Escherichia hermannii</i>    | 1    |
| <i>Hafnia alvei</i>             | 1    |
| <i>Klebsiella terrigena</i>     | 1    |
| <i>Kluyvera intermedia</i>      | 1    |
| <i>Kluyvera sp.</i>             | 1    |
| <i>Plesiomonas shigelloides</i> | 1    |
| <i>Rahnella aquatilis</i>       | 1    |
| <i>Salmonella sp.</i>           | 1    |
| <i>Serratia odorifera</i>       | 1    |
| <hr/>                           |      |
| Total                           | 3776 |
